# Supplementary material for: Development and validation of a cancer stem cell-related signature for prognostic prediction in pancreatic ductal adenocarcinoma
Source: PubMed Central journal article supplement (PMC7507616; doi:10.1186/s12967-020-02527-1), 2020-09-21
Supplement: 12967_2020_2527_MOESM1_ESM.pdf [file 12967_2020_2527_MOESM1_ESM.pdf]

**Supplementary Table S1.****Clinicopathological characteristics of patients involved in the study.**

| <b>Characteristics</b>    | <b>MTAB-6134(n=288)</b> | <b>PACA-AU(n=92)</b> | <b>PACA-CA(n=182)</b> | <b>TCGA(n=141)</b> |
|---------------------------|-------------------------|----------------------|-----------------------|--------------------|
| <b>Age at diagnosis</b>   |                         |                      |                       |                    |
| ≤60                       | NA                      | 27                   | 55                    | 46                 |
| >60                       | NA                      | 64                   | 109                   | 95                 |
| NA                        | NA                      | 1                    | 18                    |                    |
| <b>Gender</b>             |                         |                      |                       |                    |
| Male                      | 166                     | 48                   | 100                   | 75                 |
| Female                    | 122                     | 44                   | 82                    | 66                 |
| <b>Histological grade</b> |                         |                      |                       |                    |
| G1                        | 110                     | 1                    | 16                    | 18                 |
| G2                        | 130                     | 48                   | 42                    | 82                 |
| G3                        | 48                      | 25                   | 27                    | 40                 |
| G4                        | 0                       | 2                    | 5                     | 1                  |
| NA                        | 0                       | 16                   | 92                    | 0                  |
| <b>T Stage</b>            |                         |                      |                       |                    |
| T1                        | 12                      | 2                    | NA                    | 4                  |
| T2                        | 39                      | 10                   | NA                    | 13                 |
| T3                        | 237                     | 64                   | NA                    | 120                |
| T4                        | 0                       | 2                    | NA                    | 3                  |
| NA                        | 0                       | 14                   | NA                    | 1                  |
| <b>N stage</b>            |                         |                      |                       |                    |
| N0                        | 72                      | 26                   | NA                    | 35                 |
| N1                        | 216                     | 51                   | NA                    | 105                |
| NA                        | 0                       | 15                   | NA                    | 1                  |
| <b>Residual tumor</b>     |                         |                      |                       |                    |
| R0                        | 235                     | NA                   | NA                    | 78                 |
| R1                        | 49                      | NA                   | NA                    | 47                 |
| R2                        | 0                       | NA                   | NA                    | 5                  |
| NA                        | 4                       | NA                   | NA                    | 11                 |

NA: not available

**Supplementary Table S2****Quantitative real-time PCR primer sequences**

| <b>Name</b>   | <b>Primer (5'-3')</b>                                         |
|---------------|---------------------------------------------------------------|
| <b>DCBLD2</b> | <b>F:GCTCCAACCTCCTCCTTCTCC<br/>R:GTGTCCACATCCATCACCTTGCTG</b> |
| <b>GSDMD</b>  | <b>F:GAGTGTGGCCTAGAGCTGG<br/>R:GGCTCAGTCCTGATAGCAGTG</b>      |
| <b>PLOD2</b>  | <b>F:CATGGACACAGGATAATGGCTG<br/>R:AGGGGTTGGTTGCTCAATAAAAA</b> |
| <b>PMAIP1</b> | <b>F:GCTGGAAGTCGAGTGTGCTA<br/>R:CCGCCAGTCTAATCACAGG</b>       |
| <b>GAPDH</b>  | <b>F:GCACCGTCAAGGCTGAGAAC<br/>R:TGGTGAAGACGCCAGTGGA</b>       |

**Supplementary Table S3.****The C-index of prognostic signatures in six independent datasets.**

| <b>Dataset</b>   | <b>4-gene signature</b> | <b>Zhou-6</b>          | <b>Tian-3</b>          | <b>Zhou-3</b>          |
|------------------|-------------------------|------------------------|------------------------|------------------------|
| <b>GSE21501</b>  | <b>0.59(0.52-0.67)</b>  | <b>0.49(0.41-0.56)</b> | <b>0.55(0.47-0.62)</b> | <b>0.51(0.43-0.59)</b> |
| <b>GSE71729</b>  | <b>0.59(0.52-0.66)</b>  | <b>0.51(0.44-0.58)</b> | <b>0.54(0.48-0.61)</b> | <b>0.54(0.46-0.61)</b> |
| <b>MTAB-6134</b> | <b>0.65(0.61-0.69)</b>  | <b>0.60(0.55-0.65)</b> | <b>0.59(0.55-0.64)</b> | <b>0.58(0.53-0.62)</b> |
| <b>PACA-AU</b>   | <b>0.69(0.62-0.75)</b>  | <b>0.64(0.56-0.72)</b> | <b>0.63(0.55-0.70)</b> | <b>-</b>               |
| <b>PACA-CA</b>   | <b>0.59(0.54-0.65)</b>  | <b>0.56(0.51-0.61)</b> | <b>0.54(0.49-0.59)</b> | <b>0.59(0.54-0.64)</b> |
| <b>TCGA</b>      | <b>0.62(0.56-0.68)</b>  | <b>0.66(0.60-0.73)</b> | <b>0.67(0.60-0.73)</b> | <b>0.61(0.55-0.67)</b> |
