# Supplementary material for: Development and validation of a cancer stem cell-related signature for prognostic prediction in pancreatic ductal adenocarcinoma
Source: PubMed Central journal article supplement (PMC7507616; doi:10.1186/s12967-020-02527-1), 2020-09-21
Supplement: 12967_2020_2527_MOESM2_ESM.pdf [file 12967_2020_2527_MOESM2_ESM.pdf]

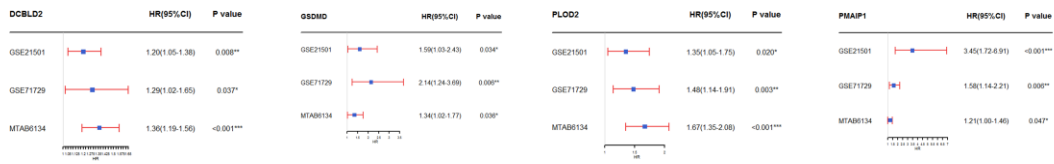

**Figure S1. Univariate Cox regression analyses of the four genes in three independent dataset.**

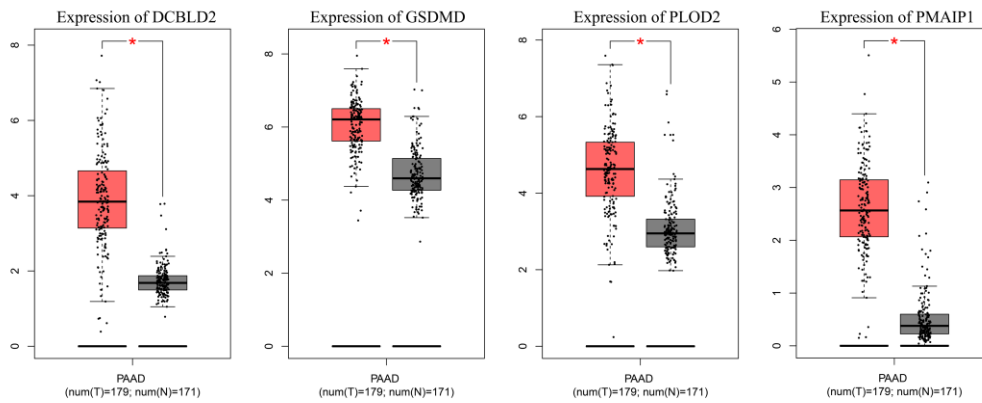

**Figure S2. The expression of the four genes in cancer tissues and normal tissues.**
